# Supplementary material for: Theobromine is associated with slower epigenetic ageing
Source: publisher site journal article supplement (doi:10.18632/aging.206344), 2025-12-10
Supplement: Supplementary file [file aging-v17-206344-supplementary-material-SD1.pdf]

## SUPPLEMENTARY FIGURE

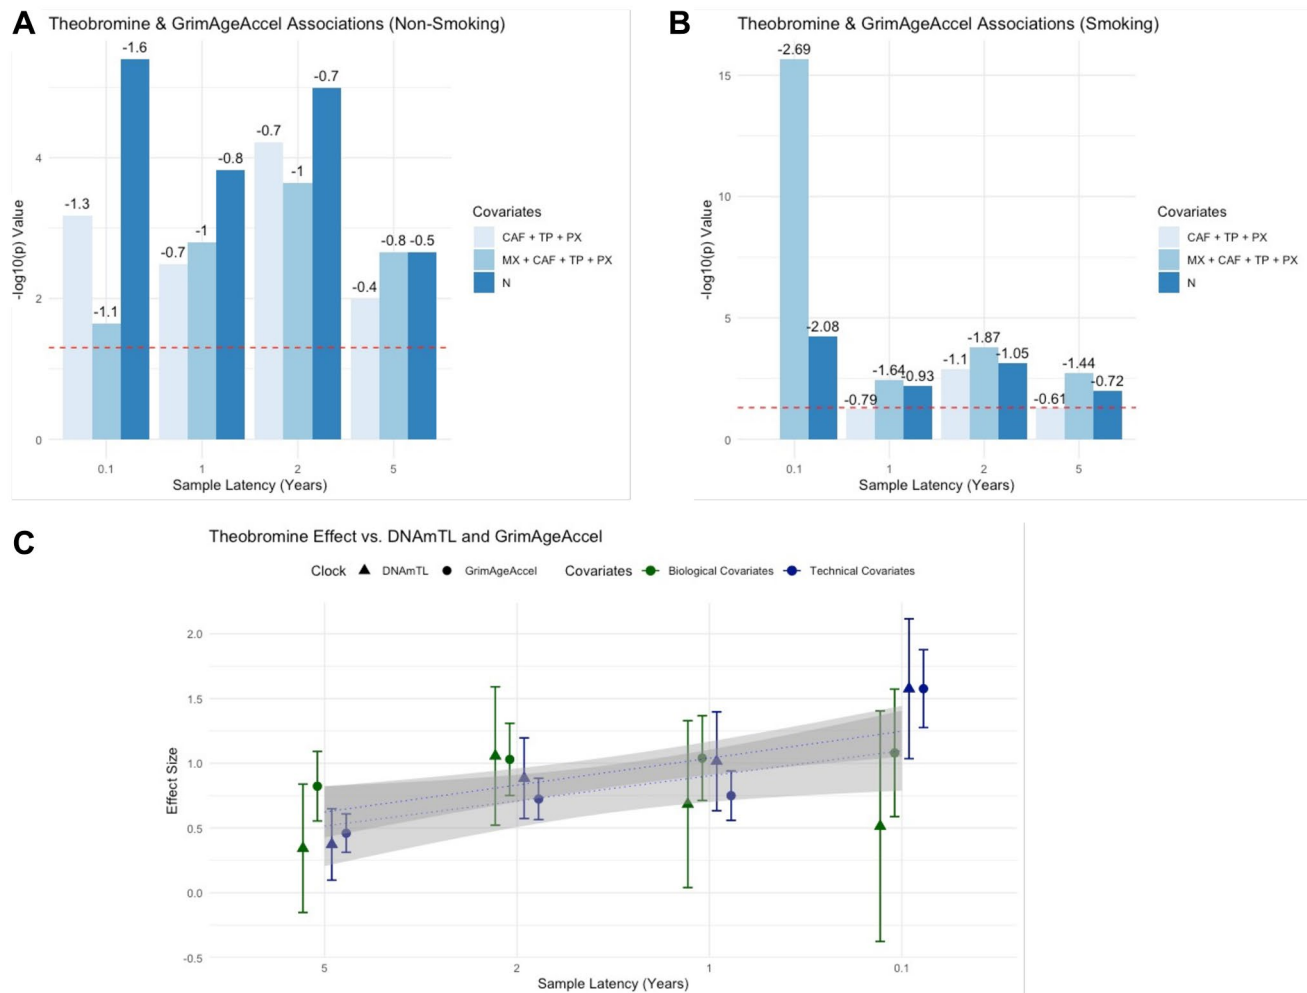

**Supplementary Figure 1. Sensitivity analyses exploring the specificity of the theobromine association with epigenetic ageing measures in the TwinsUK sample. (A, B)** Theobromine and GrimAge association significance in never smokers and current/ex-smokers. Covariates in the models included 'N' (BMI + Age + Cell Proportions), as well as 'N' and methylxanthines CAF, TP, PX and MX, as labelled on the Figure. TB coefficient effect sizes are shown. **(C)** Magnitude of effect sizes of DNAmTL association with GrimAgeAccel. As the scales and direction differ (with negative GrimAgeAccel and positive DNAmTL both indicating a slower age) the regression coefficient values of GrimAgeAccel were converted to absolute values and maximum values of DNAmTL were scaled to GrimAgeAccel (scale factor: 43.43). Correlation lines between latency values are applied (linear model) and standard errors are shown.
