# Supplementary material for: Theobromine is associated with slower epigenetic ageing
Source: publisher site journal article supplement (doi:10.18632/aging.206344), 2025-12-10
Supplement: Supplementary file [file aging-v17-206344-supplementary-material-SD2.pdf]

Supplementary Table 1. Association results in TwinsUK cohort.

| Sample Latency (yrs) | n   | Covariates         | GrimAge |           |           | DNAmTL      |             |          | DunedinPACE  |             |          | PhenoAge    |            |          | AgeAccelHannum |            |          |
|----------------------|-----|--------------------|---------|-----------|-----------|-------------|-------------|----------|--------------|-------------|----------|-------------|------------|----------|----------------|------------|----------|
|                      |     |                    | $\beta$ | <i>se</i> | <i>p</i>  | $\beta$     | <i>se</i>   | <i>p</i> | $\beta$      | <i>se</i>   | <i>p</i> | $\beta$     | <i>se</i>  | <i>p</i> | $\beta$        | <i>se</i>  | <i>p</i> |
| 5                    | 509 | N                  | -0.46   | 0.148352  | 0.002227  | 0.008597492 | 0.006367478 | 0.1784   | 0.002433033  | 0.003743138 | 0.5135   | -0.1474319  | 0.2116257  | 0.4955   | 0.2210168      | 0.179496   | 0.2135   |
| 2                    | 420 | N                  | -0.724  | 0.1596351 | 1.03E-05  | 0.020360325 | 0.007167899 | 0.004462 | -0.0068576   | 0.004158709 | 0.09612  | -0.3780389  | 0.245318   | 0.128    | 0.03520191     | 0.20896333 | 0.8581   |
| 1                    | 276 | N                  | -0.75   | 0.1907382 | 0.00015   | 0.02338561  | 0.00878681  | 0.00798  | -0.004733561 | 0.004859301 | 0.3249   | -0.4952221  | 0.3012944  | 0.09743  | -0.06744427    | 0.24238152 | 0.7961   |
| 0.1                  | 121 | N                  | -1.576  | 0.3005898 | 3.99E-06  | 0.03628296  | 0.01242632  | 0.002985 | -0.007792432 | 0.006966381 | 0.3101   | -0.3016093  | 0.4554014  | 0.5374   | -0.04750247    | 0.33094191 | 0.918    |
| 5                    | 509 | CAF + TP + PX      | -0.44   | 0.1698753 | 0.01004   | 0.010702108 | 0.007202701 | 0.1362   | -0.001484194 | 0.004284681 | 0.7303   | -0.1722435  | 0.2427985  | 0.4777   | 0.2069323      | 0.205579   | 0.3087   |
| 2                    | 420 | CAF + TP + PX      | -0.734  | 0.1795713 | 6.07E-05  | 0.021952714 | 0.007920683 | 0.005354 | -0.006831862 | 0.004684106 | 0.1399   | -0.366313   | 0.2735349  | 0.1787   | 0.02361039     | 0.23384471 | 0.9211   |
| 1                    | 276 | CAF + TP + PX      | -0.667  | 0.2215733 | 0.003227  | 0.02729603  | 0.01000793  | 0.006141 | -0.001898739 | 0.005626773 | 0.7353   | -0.4451804  | 0.3473743  | 0.1921   | -0.1975919     | 0.2786004  | 0.4809   |
| 0.1                  | 121 | CAF + TP + PX      | -1.274  | 0.3532336 | 0.0006571 | 0.0298907   | 0.01470864  | 0.03303  | -0.001529166 | 0.007725097 | 0.86     | -0.1889974  | 0.5272425  | 0.7243   | -0.07701537    | 0.39117402 | 0.853    |
| 5                    | 509 | CAF + TP + PX + MX | -0.823  | 0.2680991 | 0.002185  | 0.007905393 | 0.011399421 | 0.4884   | -0.001865078 | 0.006759327 | 0.7805   | -0.08618605 | 0.37925441 | 0.8215   | 0.06192471     | 0.32195188 | 0.8439   |
| 2                    | 420 | CAF + TP + PX + MX | -1.03   | 0.2794238 | 0.0002277 | 0.02432609  | 0.01231021  | 0.04634  | -0.008733971 | 0.007285852 | 0.2239   | -0.1354184  | 0.4227936  | 0.7471   | -0.2425322     | 0.3602748  | 0.4988   |
| 1                    | 276 | CAF + TP + PX + MX | -1.04   | 0.3276549 | 0.001572  | 0.01576093  | 0.01482524  | 0.2866   | -0.003045039 | 0.008400915 | 0.7095   | -0.01868127 | 0.51170186 | 0.9708   | -0.1721211     | 0.4128901  | 0.6739   |
| 0.1                  | 121 | CAF + TP + PX + MX | -1.08   | 0.4919467 | 0.02253   | 0.01183208  | 0.02050152  | 0.5457   | 0.01806164   | 0.01014006  | 0.0739   | 0.1613058   | 0.7467483  | 0.802    | -0.3171138     | 0.5498856  | 0.5286   |

Sample Latency is provided in years between methylation and metabolomic measurements. Covariates included in the linear model are ‘N’ (BMI + Age + Cell Proportions) and methylxathines CAF, TP, PX and MX as labelled.
